# Supplementary material for: Levels of organochlorines and lipids across pregnancy, delivery and postpartum periods in women from Northern Norway
Source: Royal Society of Chemistry journal article supplement (doi:10.1039/c0em00346h), 2010-01-01
Supplement: c0em00346h.pdf [file c0em00346h.pdf]

## Supplementary Data Depository

### Note 1. Organochlorine compounds not quantified

The following organochlorine pesticides were difficult to quantify or not quantifiable because the coefficient of variation (CV) exceeded 70 % and their concentrations were low: *oxy*-chlordane; *trans*-chlordane; *cis*-chlordane; *trans*-nonachlor; *cis*-nonachlor; heptachlor; mirex; PCBs 28, 52, 101, 105, 149, 156, and 194; *o,p'*-DDE: 1,1-dichloro-2-(*o*-chlorophenyl)-2-(*p*-chlorophenyl)ethylene; and *o,p'*-DDD: 1,1-dichloro-2-(*o*-chlorophenyl)-2-(*p*-chlorophenyl)ethane.

**Table S1** Lipid-adjusted levels (ng/g) of PCBs and pesticides in maternal serum samples from Northern Norway

| Compound <sup>a</sup> | n  | 2 <sup>nd</sup> trimester pregnancy (P1) |                 |      |          | n <sup>b</sup> | 3 days postpartum (P2)            |                 |      |          | n <sup>b</sup> | 6 weeks postpartum (P3)           |                 |      |          |
|-----------------------|----|------------------------------------------|-----------------|------|----------|----------------|-----------------------------------|-----------------|------|----------|----------------|-----------------------------------|-----------------|------|----------|
|                       |    | Concentration (ng/g) lipid weight        |                 |      |          |                | Concentration (ng/g) lipid weight |                 |      |          |                | Concentration (ng/g) lipid weight |                 |      |          |
|                       |    | GM <sup>c</sup>                          | AM <sup>d</sup> | SD   | Min-Max  |                | GM <sup>c</sup>                   | AM <sup>d</sup> | SD   | Min-Max  |                | GM <sup>c</sup>                   | AM <sup>d</sup> | SD   | Min-Max  |
| PCB-99                | 50 | 2.0                                      | 2.2             | 1.0  | 0.6-5.3  | 49             | 1.8                               | 2.0             | 1.1  | 0.5-5.0  | 49             | 1.8                               | 2.0             | 1.0  | 0.4-4.1  |
| PCB-101               | 48 | 0.8                                      | 0.9             | 0.3  | 0.4-1.6  | 41             | 0.5                               | 0.5             | 0.3  | 0.3-1.7  | 36             | 0.8                               | 0.9             | 0.5  | 0.4-2.5  |
| PCB-118               | 48 | 4.2                                      | 4.7             | 2.1  | 1.5-10.0 | 49             | 3.8                               | 4.3             | 2.3  | 1.0-9.3  | 49             | 4.1                               | 4.6             | 2.3  | 1.0-10.3 |
| PCB-138               | 50 | 12.7                                     | 14.1            | 6.5  | 4.0-28.0 | 50             | 12.5                              | 14.0            | 6.8  | 2.9-34.8 | 49             | 12.2                              | 13.7            | 6.3  | 2.6-34.1 |
| PCB-163               | 49 | 5.3                                      | 6.2             | 3.6  | 1.6-17.2 | 50             | 4.1                               | 4.7             | 2.4  | 0.7-10.8 | 49             | 4.0                               | 4.5             | 2.2  | 0.8-11.2 |
| PCB-153               | 50 | 22.6                                     | 25.1            | 11.8 | 7.6-55.2 | 50             | 22.2                              | 25.1            | 12.8 | 5.6-67.9 | 49             | 22.2                              | 24.9            | 12.6 | 5.1-72.8 |
| PCB-156               | 47 | 2.2                                      | 2.5             | 1.2  | 0.5-5.1  | 50             | 2.1                               | 2.4             | 1.2  | 0.6-5.1  | 49             | 1.9                               | 2.3             | 1.2  | 0.6-5.3  |
| PCB-170               | 46 | 6.2                                      | 7.0             | 3.6  | 1.1-15.9 | 43             | 6.2                               | 6.9             | 3.3  | 2.5-15.8 | 38             | 5.8                               | 6.5             | 3.1  | 2.2-15.5 |
| PCB-180               | 50 | 15.2                                     | 17.1            | 8.2  | 5.1-36.3 | 50             | 15.0                              | 17.0            | 8.6  | 4.1-40.0 | 48             | 15.1                              | 17.1            | 8.5  | 3.5-43.4 |
| PCB-183               | 49 | 1.3                                      | 1.5             | 0.7  | 0.6-3.2  | 50             | 1.4                               | 1.5             | 0.8  | 0.6-4.0  | 47             | 1.4                               | 1.5             | 0.8  | 0.6-4.2  |
| PCB-187               | 50 | 4.2                                      | 4.7             | 2.4  | 1.2-11.9 | 49             | 4.2                               | 4.8             | 2.6  | 0.9-14.6 | 44             | 3.7                               | 4.2             | 2.0  | 0.6-9.1  |
| PCB-194               | 50 | 1.8                                      | 2.0             | 1.1  | 0.7-4.3  | 50             | 1.7                               | 2.0             | 1.2  | 0.6-5.1  | 49             | 1.6                               | 1.8             | 1.0  | 0.7-5.0  |
| <i>p,p'</i> -DDE      | 50 | 38.7                                     | 42.8            | 20.4 | 15.4-107 | 50             | 37.8                              | 41.9            | 20.2 | 8.4-126  | 45             | 42.2                              | 47.1            | 24.6 | 8.6-159  |
| HCB                   | 50 | 9.6                                      | 10.4            | 4.3  | 4.3-24.0 | 50             | 9.2                               | 10.1            | 4.9  | 3.3-29.4 | 50             | 9.9                               | 10.5            | 4.4  | 3.9-28.5 |
| <i>trans</i> -NC      | 50 | 2.7                                      | 3.3             | 2.0  | 0.5-8.7  | 50             | 2.9                               | 3.6             | 2.1  | 0.4-9.0  | 50             | 2.2                               | 2.7             | 1.5  | 0.4-6.3  |
| <i>cis</i> -NC        | 50 | 0.6                                      | 0.7             | 0.5  | 0.2-2.8  | 50             | 0.6                               | 0.8             | 0.6  | 0.2-4.9  | 50             | 0.6                               | 0.7             | 0.5  | 0.2-2.3  |

<sup>a</sup>See Table 2 in the article footnote b for full names.

<sup>b</sup>The number of participants (n) varies because the observed ion-mass ratios were unacceptable(see text), the data for PCBs and *p,p'*-DDE are lacking for one individual of the P3 group, and one donor was excluded from the study because she arrived in Norway recently.

<sup>c</sup>GM= Geometric mean; <sup>d</sup>AM= Arithmetic mean with the corresponding SD, minimum(Min) and maximum(Max).

**Table S2** Changes in serum concentrations of PCBs and pesticides across the collection periods P1 (2<sup>nd</sup> trimester), P2 (3 days postpartum) and P3 (6 weeks postpartum)

| Compound         | Estimates of change <sup>a,b,c,d,e</sup> | Wet-weight concentrations (pg/g serum) |              |              |                | Lipid-adjusted concentrations (ng/g lipid) |              |              |                |
|------------------|------------------------------------------|----------------------------------------|--------------|--------------|----------------|--------------------------------------------|--------------|--------------|----------------|
|                  |                                          | Time periods                           |              |              |                | Time periods                               |              |              |                |
|                  |                                          | P1/P3                                  | P2/P3        | P2/P1        | p <sup>f</sup> | P1/P3                                      | P2/P3        | P2/P1        | p <sup>f</sup> |
| PCB-99           | β                                        | 0.146                                  | 0.172        | 0.026        |                | 0.044                                      | 0.008        | -0.035       |                |
|                  | p                                        | <b>0.000</b>                           | <b>0.000</b> | <b>0.027</b> | <b>0.000</b>   | <b>0.005</b>                               | 0.528        | <b>0.002</b> | <b>0.003</b>   |
|                  | Ratio                                    | 1.40                                   | 1.49         | 1.06         |                | 1.11                                       | 1.02         | 0.92         |                |
| PCB-118          | β                                        | 0.104                                  | 0.133        | 0.028        |                | 0.006                                      | -0.031       | -0.037       |                |
|                  | p                                        | <b>0.000</b>                           | <b>0.000</b> | <b>0.013</b> | <b>0.000</b>   | 0.667                                      | <b>0.002</b> | <b>0.008</b> | <b>0.002</b>   |
|                  | Ratio                                    | 1.27                                   | 1.36         | 1.07         |                | 1.01                                       | 0.93         | 0.92         |                |
| PCB-138          | β                                        | 0.117                                  | 0.169        | 0.052        |                | 0.014                                      | 0.007        | -0.008       |                |
|                  | p                                        | <b>0.000</b>                           | <b>0.000</b> | <b>0.000</b> | <b>0.000</b>   | 0.214                                      | 0.416        | 0.506        | 0.429          |
|                  | Ratio                                    | 1.31                                   | 1.48         | 1.13         |                | 1.03                                       | 1.02         | 0.98         |                |
| PCB-163          | β                                        | 0.216                                  | 0.175        | -0.042       |                | 0.109                                      | 0.012        | -0.098       |                |
|                  | p                                        | <b>0.000</b>                           | <b>0.000</b> | 0.121        | <b>0.000</b>   | <b>0.000</b>                               | 0.253        | <b>0.000</b> | <b>0.000</b>   |
|                  | Ratio                                    | 1.64                                   | 1.50         | 0.91         |                | 1.29                                       | 1.03         | 0.80         |                |
| PCB-153          | β                                        | 0.108                                  | 0.161        | 0.052        |                | 0.006                                      | -0.001       | -0.007       |                |
|                  | p                                        | <b>0.000</b>                           | <b>0.000</b> | <b>0.000</b> | <b>0.000</b>   | 0.573                                      | 0.858        | 0.498        | 0.788          |
|                  | Ratio                                    | 1.28                                   | 1.45         | 1.13         |                | 1.01                                       | 1.0          | 0.98         |                |
| PCB-156          | β                                        | 0.145                                  | 0.194        | 0.049        |                | 0.038                                      | 0.031        | -0.007       |                |
|                  | p                                        | <b>0.000</b>                           | <b>0.000</b> | <b>0.000</b> | <b>0.000</b>   | <b>0.025</b>                               | <b>0.032</b> | 0.591        | 0.053          |
|                  | Ratio                                    | 1.40                                   | 1.56         | 1.12         |                | 1.09                                       | 1.07         | 0.98         |                |
| PCB-170          | β                                        | 0.120                                  | 0.199        | 0.079        |                | 0.017                                      | 0.036        | 0.019        |                |
|                  | p                                        | <b>0.000</b>                           | <b>0.000</b> | <b>0.000</b> | <b>0.000</b>   | 0.438                                      | <b>0.029</b> | 0.366        | 0.085          |
|                  | Ratio                                    | 1.32                                   | 1.58         | 1.20         |                | 1.04                                       | 1.09         | 1.05         |                |
| PCB-180          | β                                        | 0.105                                  | 0.160        | 0.053        |                | 0.004                                      | -0.003       | -0.006       |                |
|                  | p                                        | <b>0.000</b>                           | <b>0.000</b> | <b>0.000</b> | <b>0.000</b>   | 0.746                                      | 0.737        | 0.572        | 0.847          |
|                  | Ratio                                    | 1.27                                   | 1.44         | 1.13         |                | 1.01                                       | 0.99         | 0.99         |                |
| PCB-187          | β                                        | 0.148                                  | 0.202        | 0.055        |                | 0.045                                      | 0.043        | -0.003       |                |
|                  | p                                        | <b>0.000</b>                           | <b>0.000</b> | <b>0.000</b> | <b>0.000</b>   | <b>0.000</b>                               | <b>0.000</b> | 0.795        | <b>0.000</b>   |
|                  | Ratio                                    | 1.41                                   | 1.59         | 1.14         |                | 1.11                                       | 1.11         | 0.99         |                |
| <i>p,p'</i> -DDE | β                                        | 0.068                                  | 0.118        | 0.050        |                | -0.035                                     | -0.044       | -0.010       |                |
|                  | p                                        | <b>0.000</b>                           | <b>0.000</b> | <b>0.000</b> | <b>0.000</b>   | 0.058                                      | <b>0.000</b> | 0.597        | <b>0.001</b>   |
|                  | Ratio                                    | 1.17                                   | 1.31         | 1.12         |                | 0.92                                       | 0.90         | 0.98         |                |
| HCB              | β                                        | 0.091                                  | 0.14         | 0.043        |                | -0.011                                     | -0.028       | -0.017       |                |
|                  | p                                        | <b>0.000</b>                           | <b>0.000</b> | <b>0.001</b> | <b>0.000</b>   | 0.378                                      | <b>0.023</b> | 0.183        | 0.074          |
|                  | Ratio                                    | 1.23                                   | 1.36         | 1.10         |                | 0.98                                       | 0.94         | 0.96         |                |
| <i>trans</i> -NC | β                                        | 0.185                                  | 0.279        | 0.095        |                | 0.083                                      | 0.118        | 0.035        |                |
|                  | p                                        | <b>0.000</b>                           | <b>0.000</b> | <b>0.000</b> | <b>0.000</b>   | <b>0.000</b>                               | <b>0.000</b> | 0.051        | <b>0.000</b>   |
|                  | Ratio                                    | 1.53                                   | 1.90         | 1.25         |                | 1.21                                       | 1.31         | 1.08         |                |

<sup>a</sup>Analysis was by the linear mixed model; <sup>b</sup>Regression coefficient (β); <sup>c</sup>p-Value refers to the equality across 2 periods; <sup>d</sup>The ratio corresponds to 10<sup>β</sup>; <sup>e</sup>In the text, ratios are reported as % change[ (10<sup>β</sup>-1)\*100]; <sup>f</sup>p-Value refers to the equality across the 3 periods.
